# Supplementary material for: Resistance training reduces systolic blood pressure in metabolic syndrome: a systematic review and meta-analysis of randomised controlled trials
Source: PubMed Central journal article supplement — Br J Sports Med. 2016 Mar 8;50(23):1438–42. doi: 10.1136/bjsports-2015-094715 (PMC5136729; doi:10.1136/bjsports-2015-094715), 2016-03-08
Supplement: bjsports-2015-094715supp_figures.pdf [file bjsports-2015-094715supp_figures.pdf]

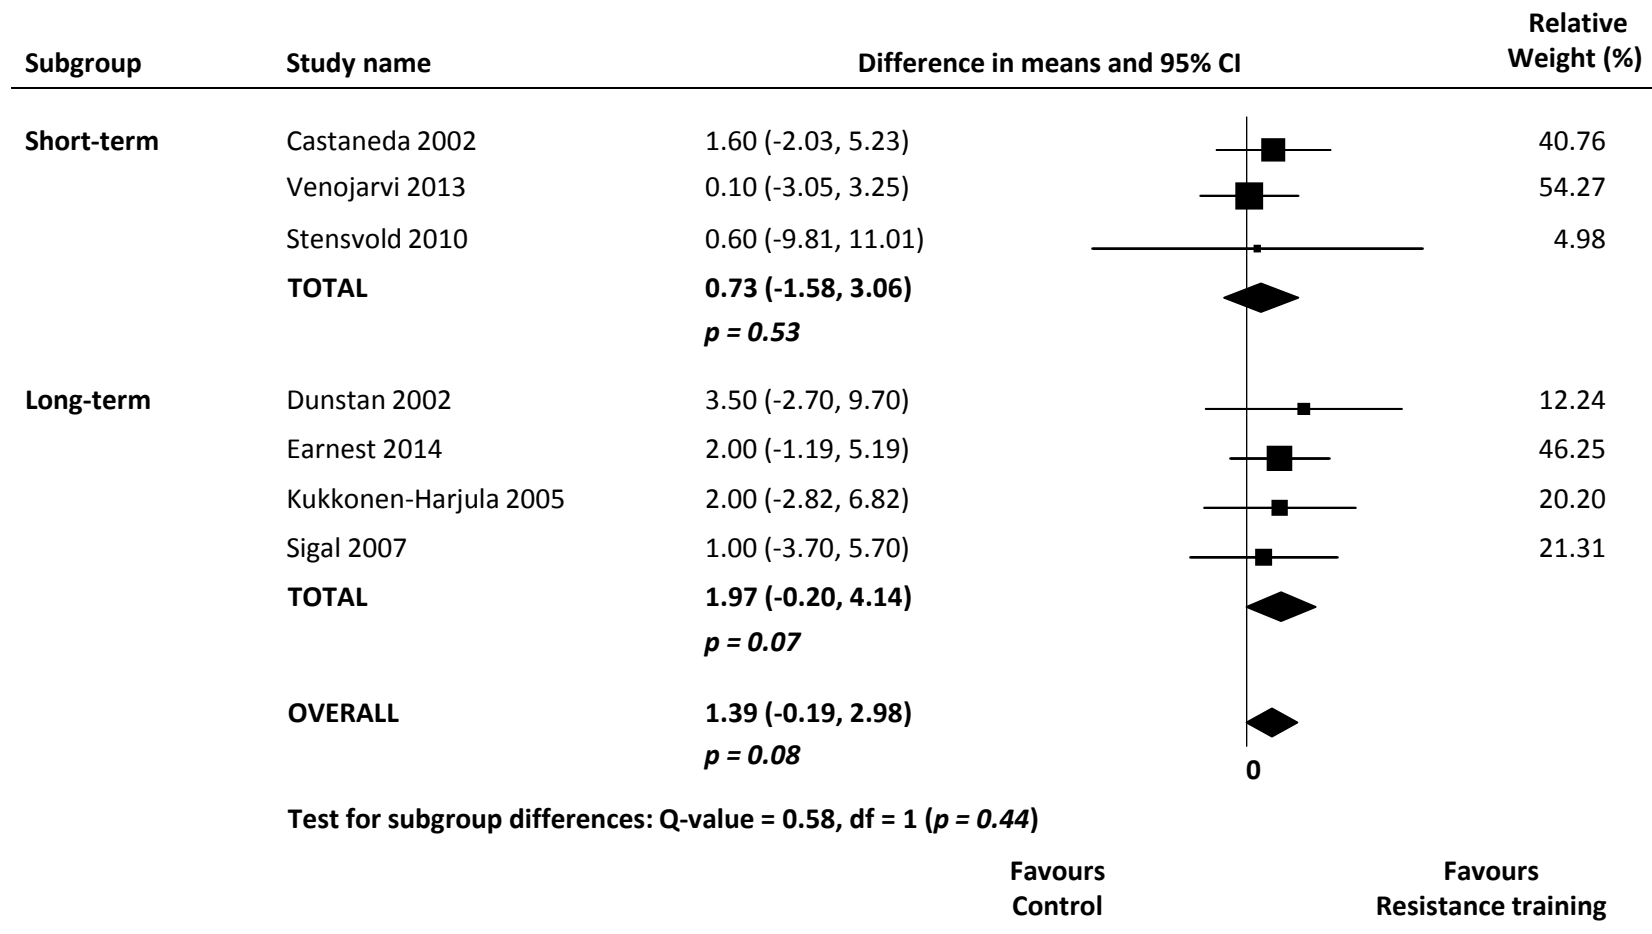

**Figure 4.** Forest plot (short vs. long-term) showing pooled MD with 95% CI for diastolic blood pressure.

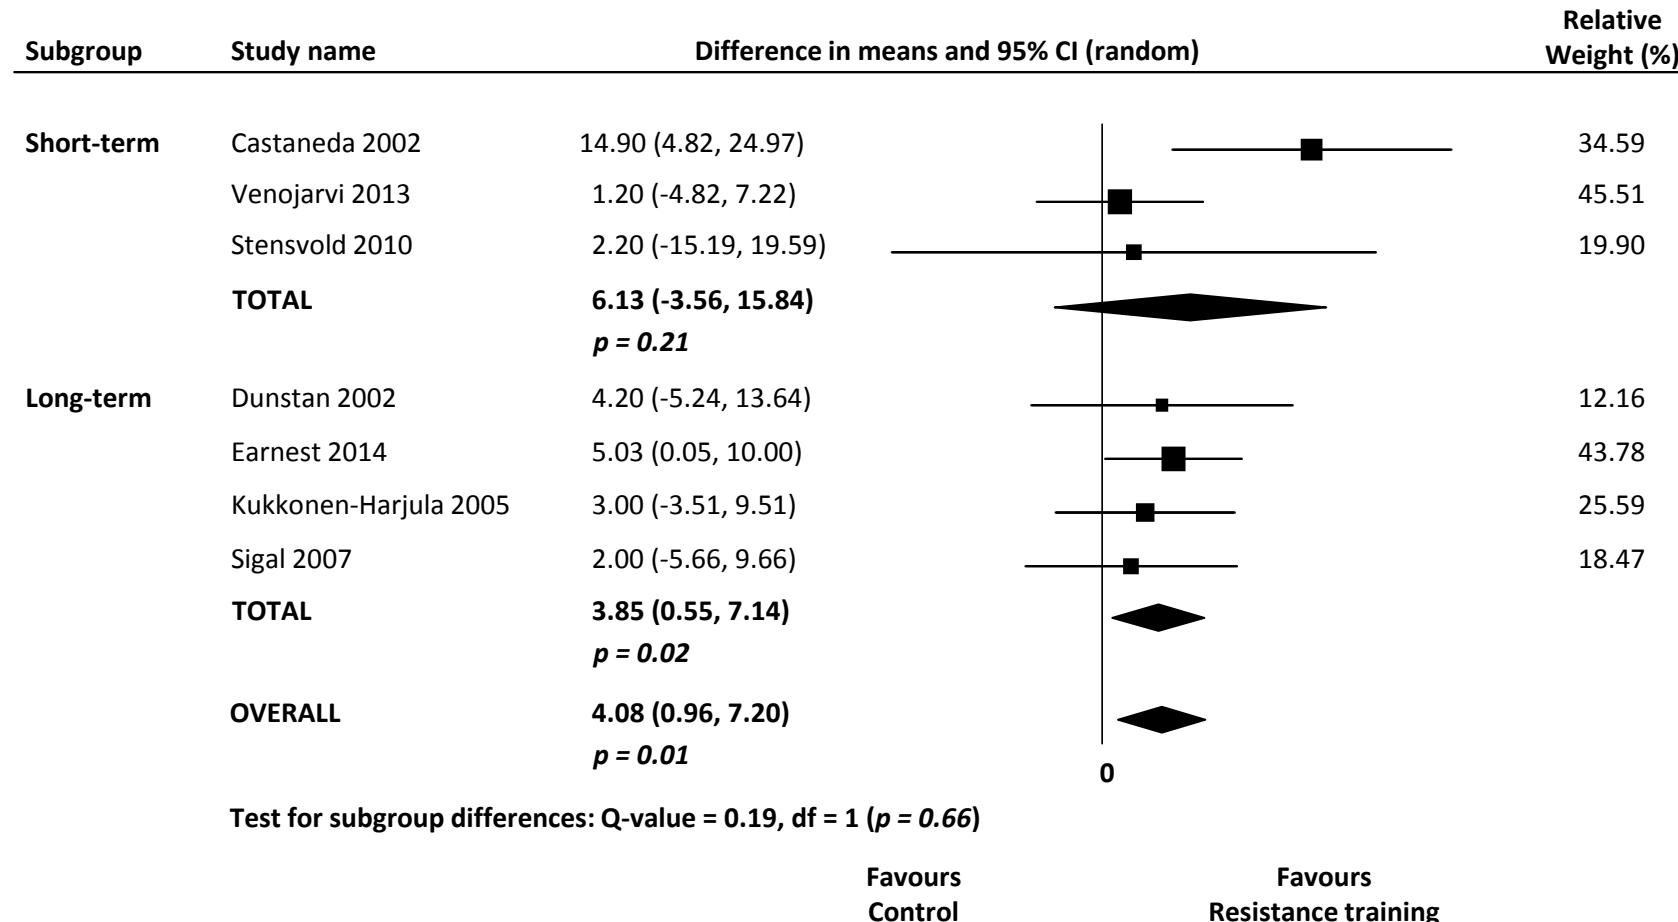

**Figure 5.** Forest plot (short vs. long-term) showing pooled MD with 95% CI for systolic blood pressure.



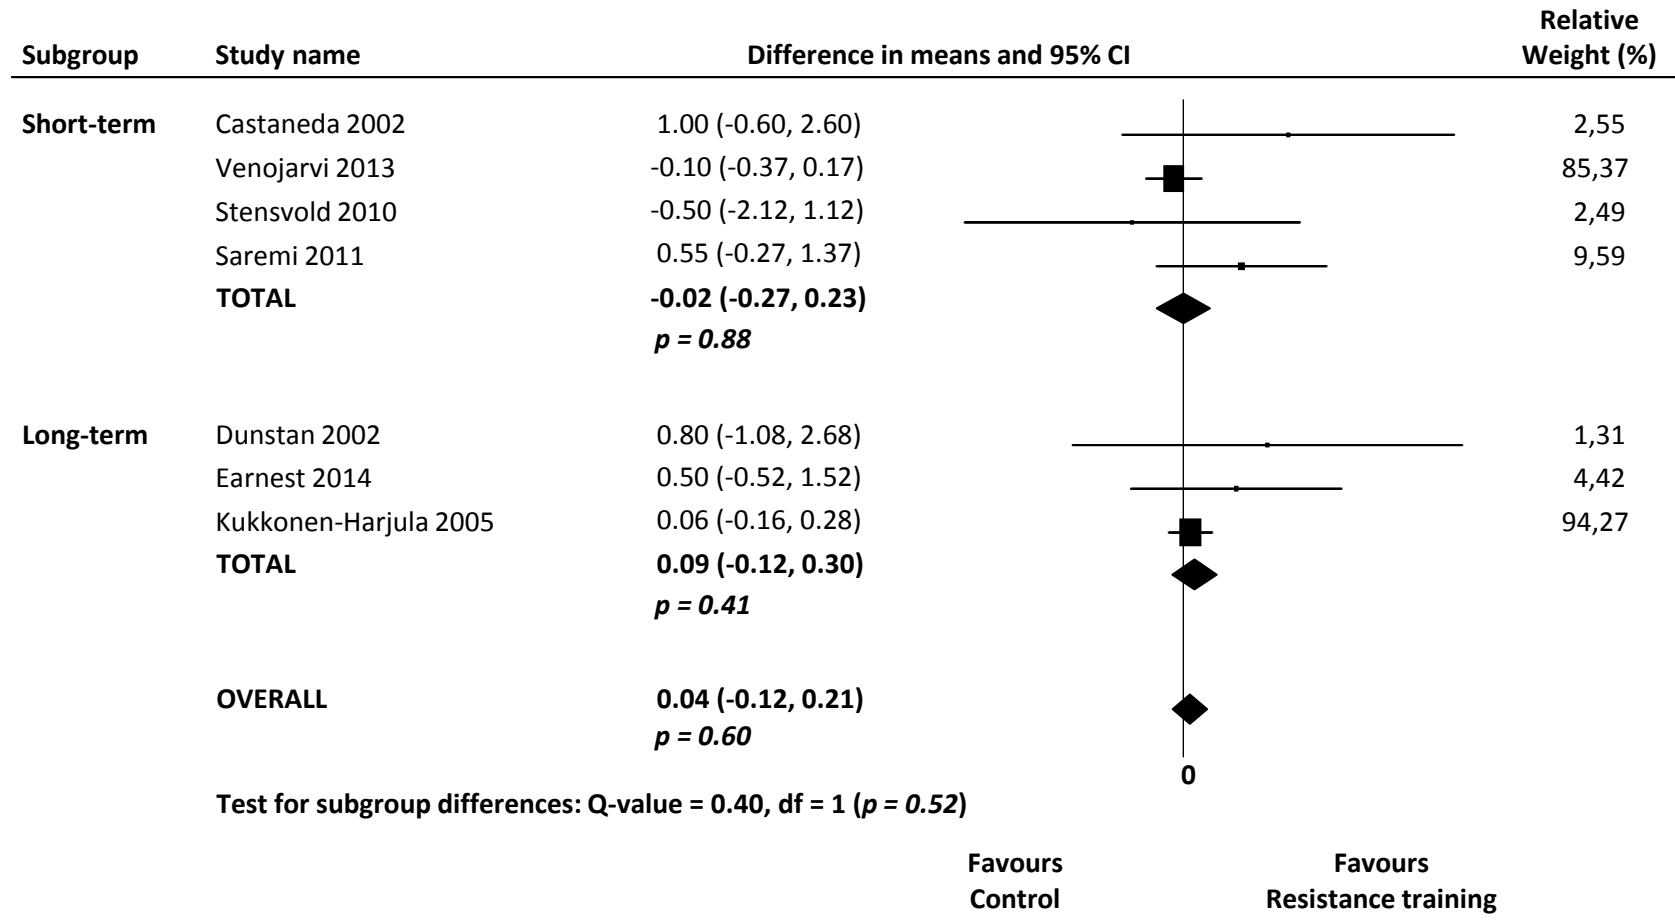

**Figure 7.** Forest plot (short vs. long-term) showing pooled MD with 95% CI for fasting glucose.

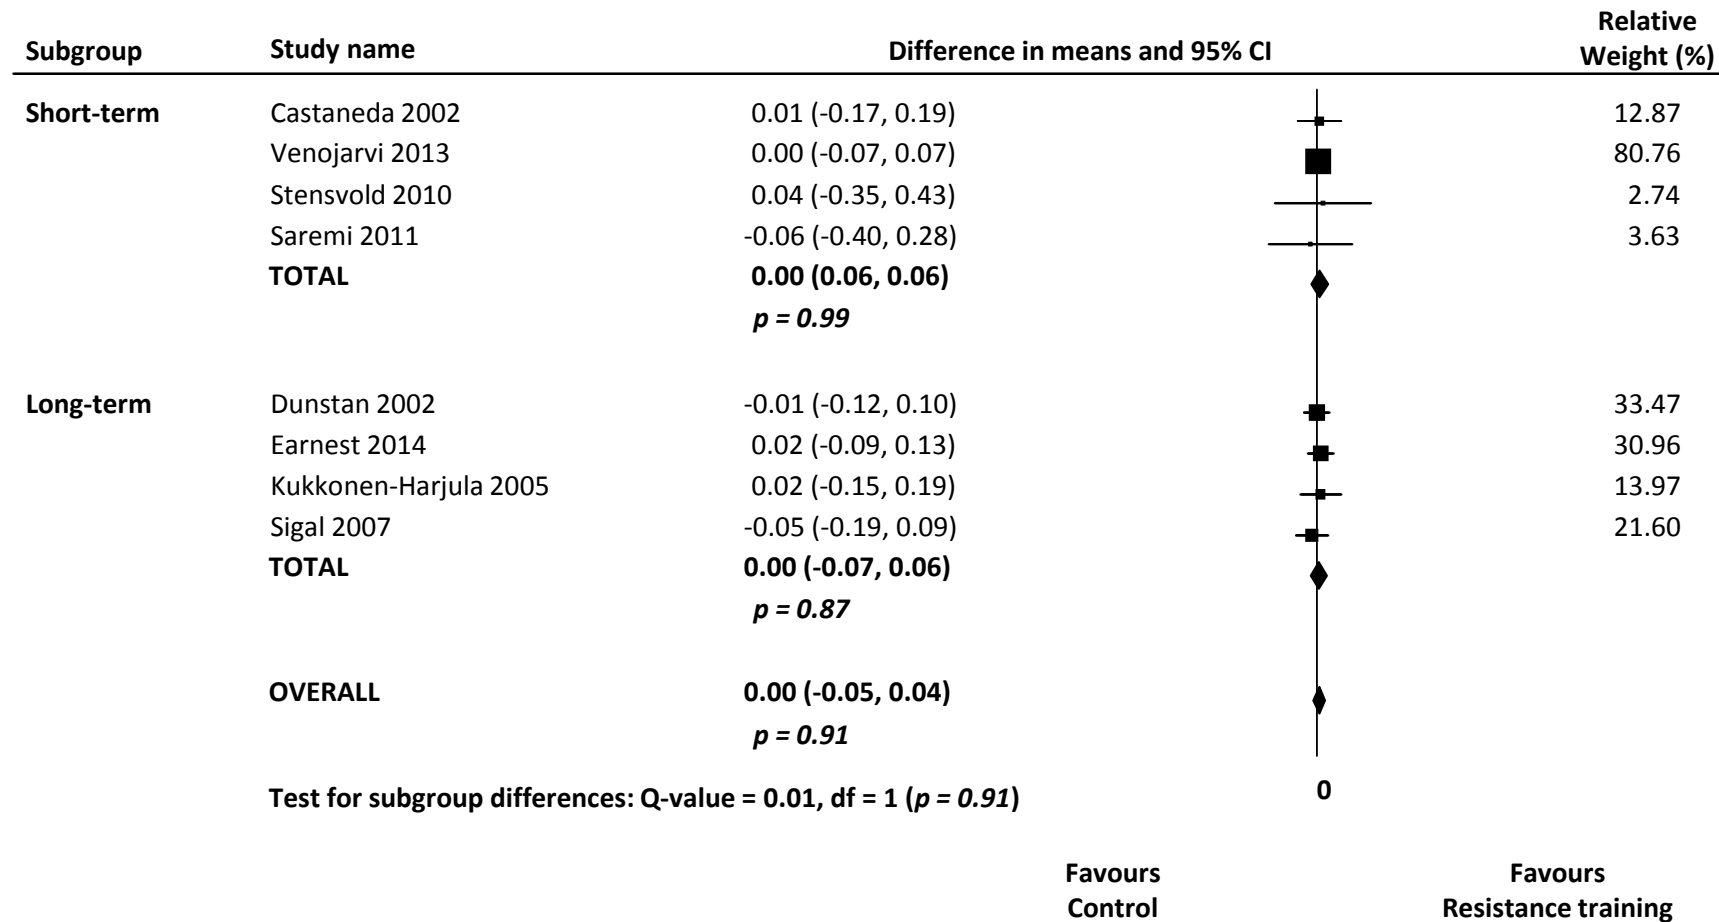

**Figure 8.** Forest plot (short vs. long-term) showing pooled MD with 95% CI for HDL-cholesterol.

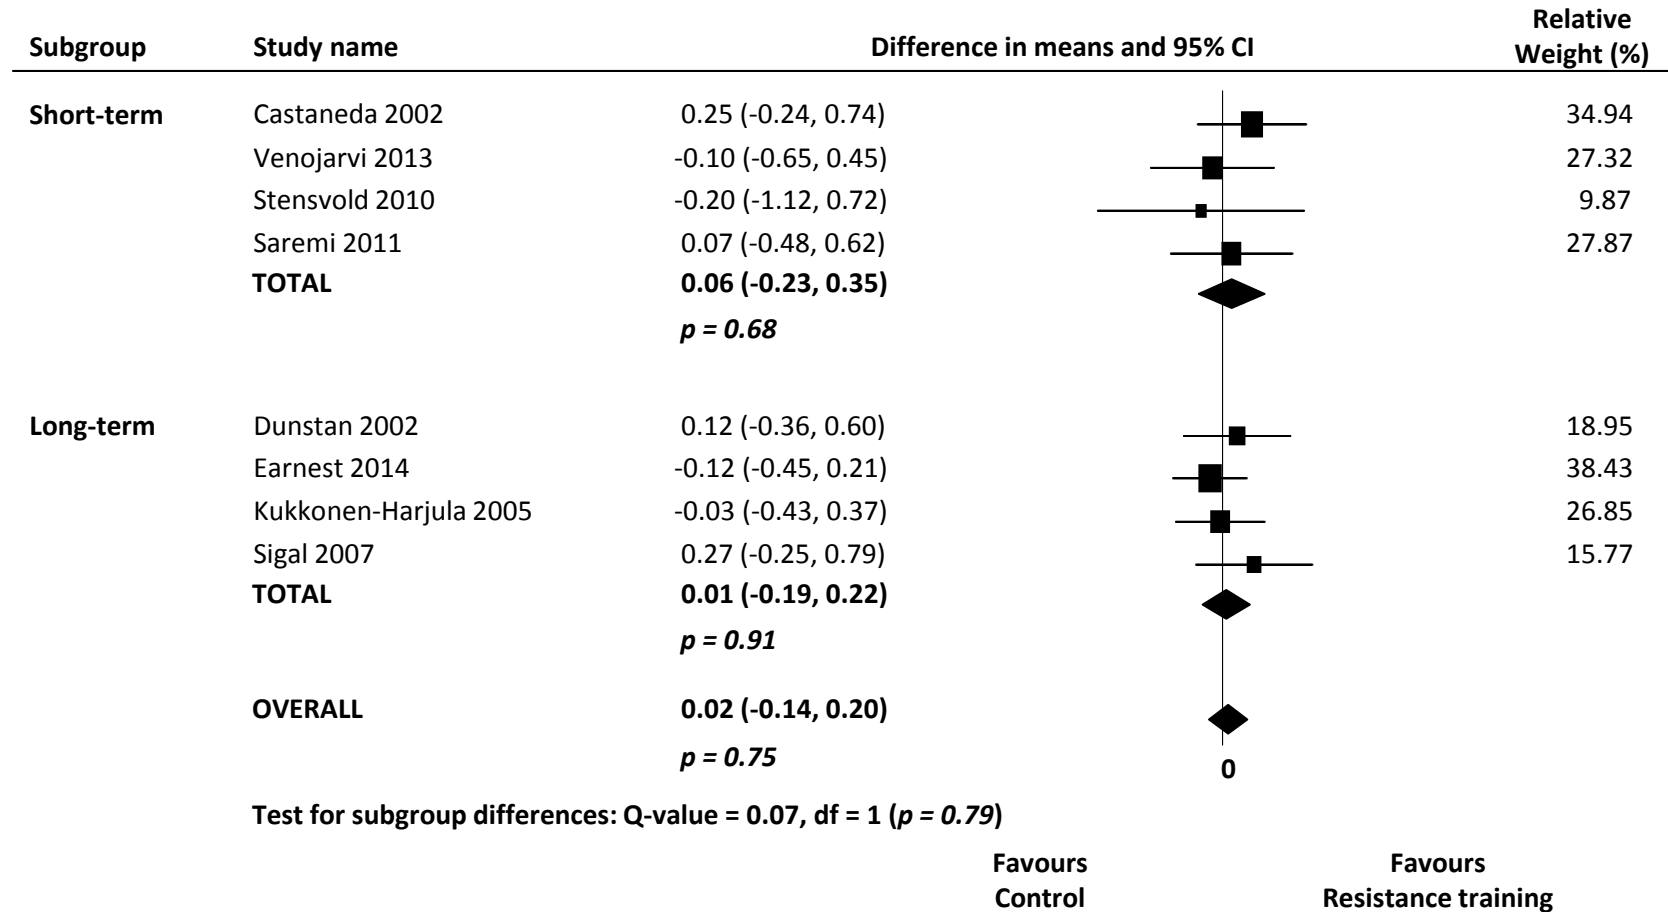

**Figure 9.** Forest plot (short vs. long-term) showing pooled MD with 95% CI for triglycerides.

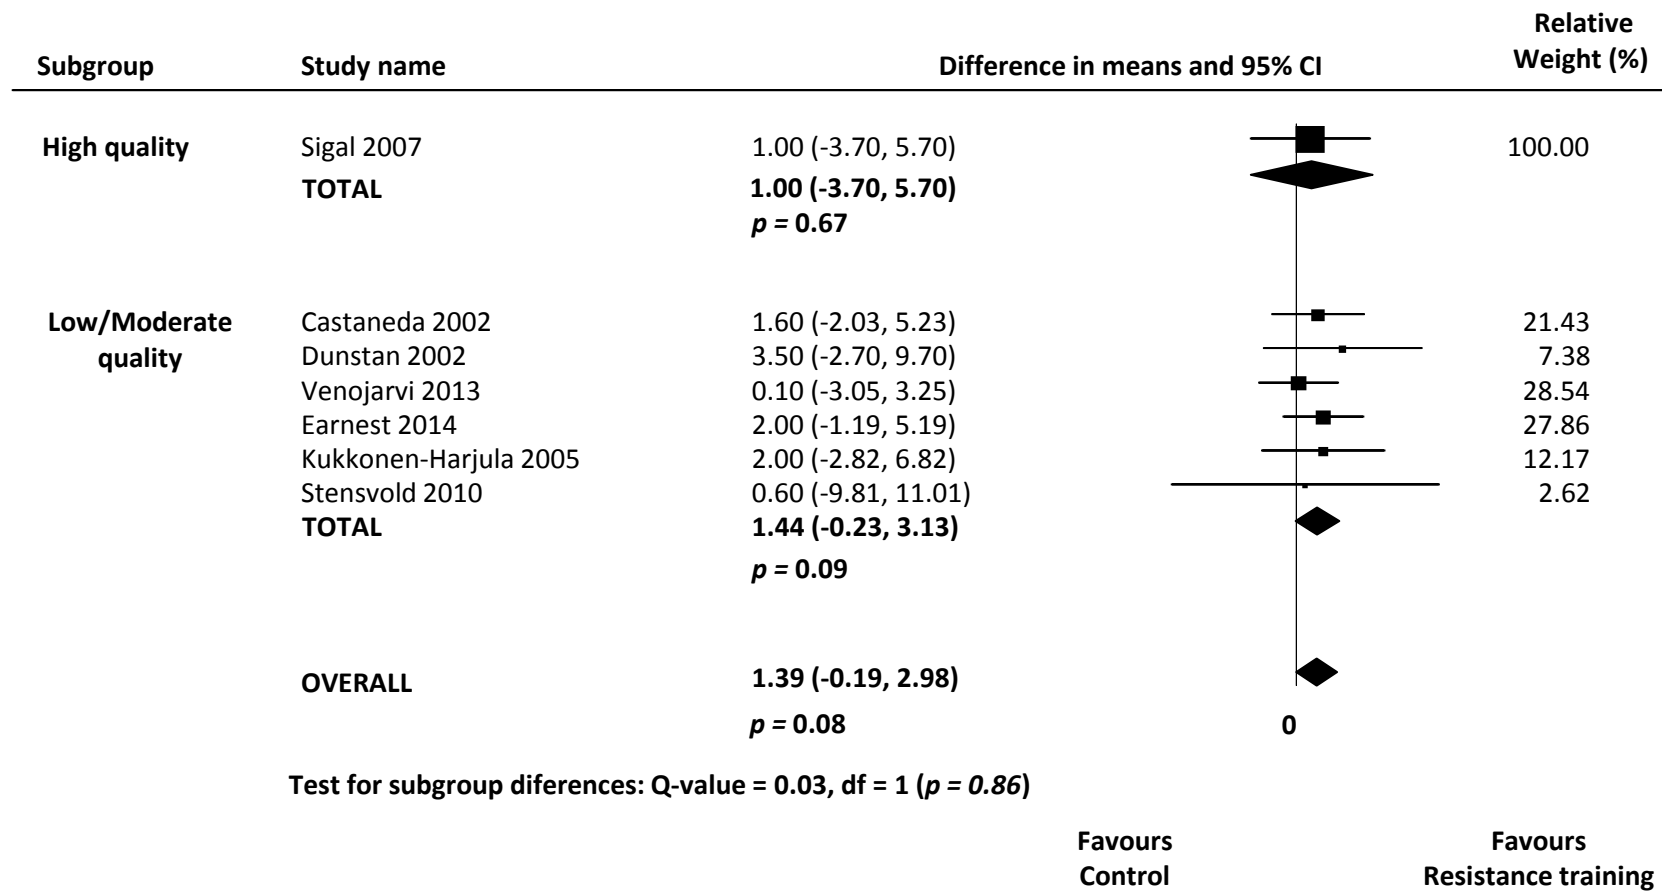

**Figure 10.** Forest plot (high vs low/moderate quality) showing pooled MD with 95% CI for diastolic blood pressure.

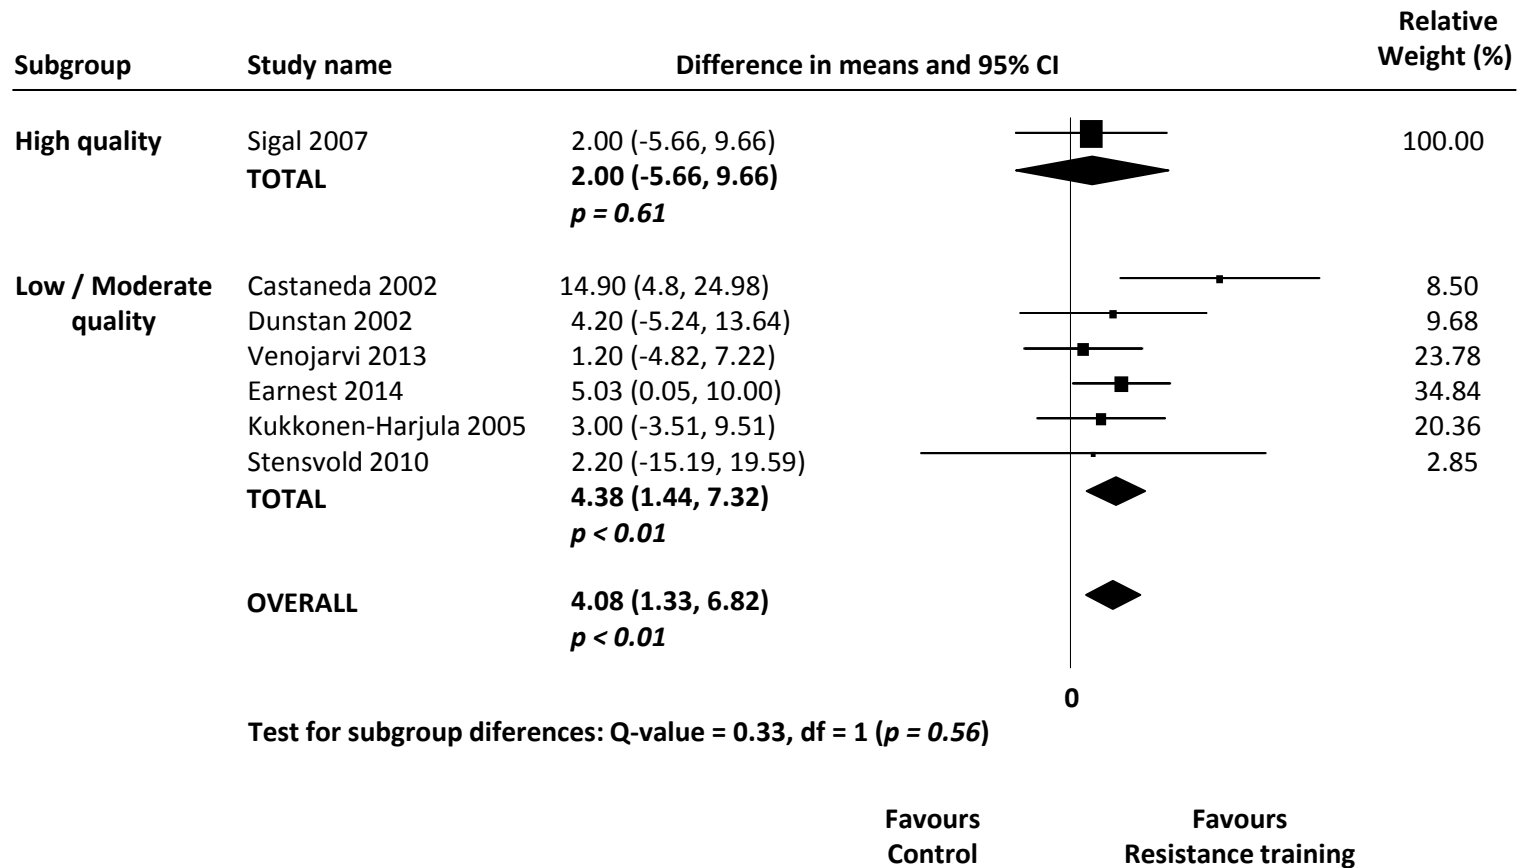

**Figure 11.** Forest plot (high vs low/moderate quality) showing pooled MD with 95% CI for systolic blood pressure.



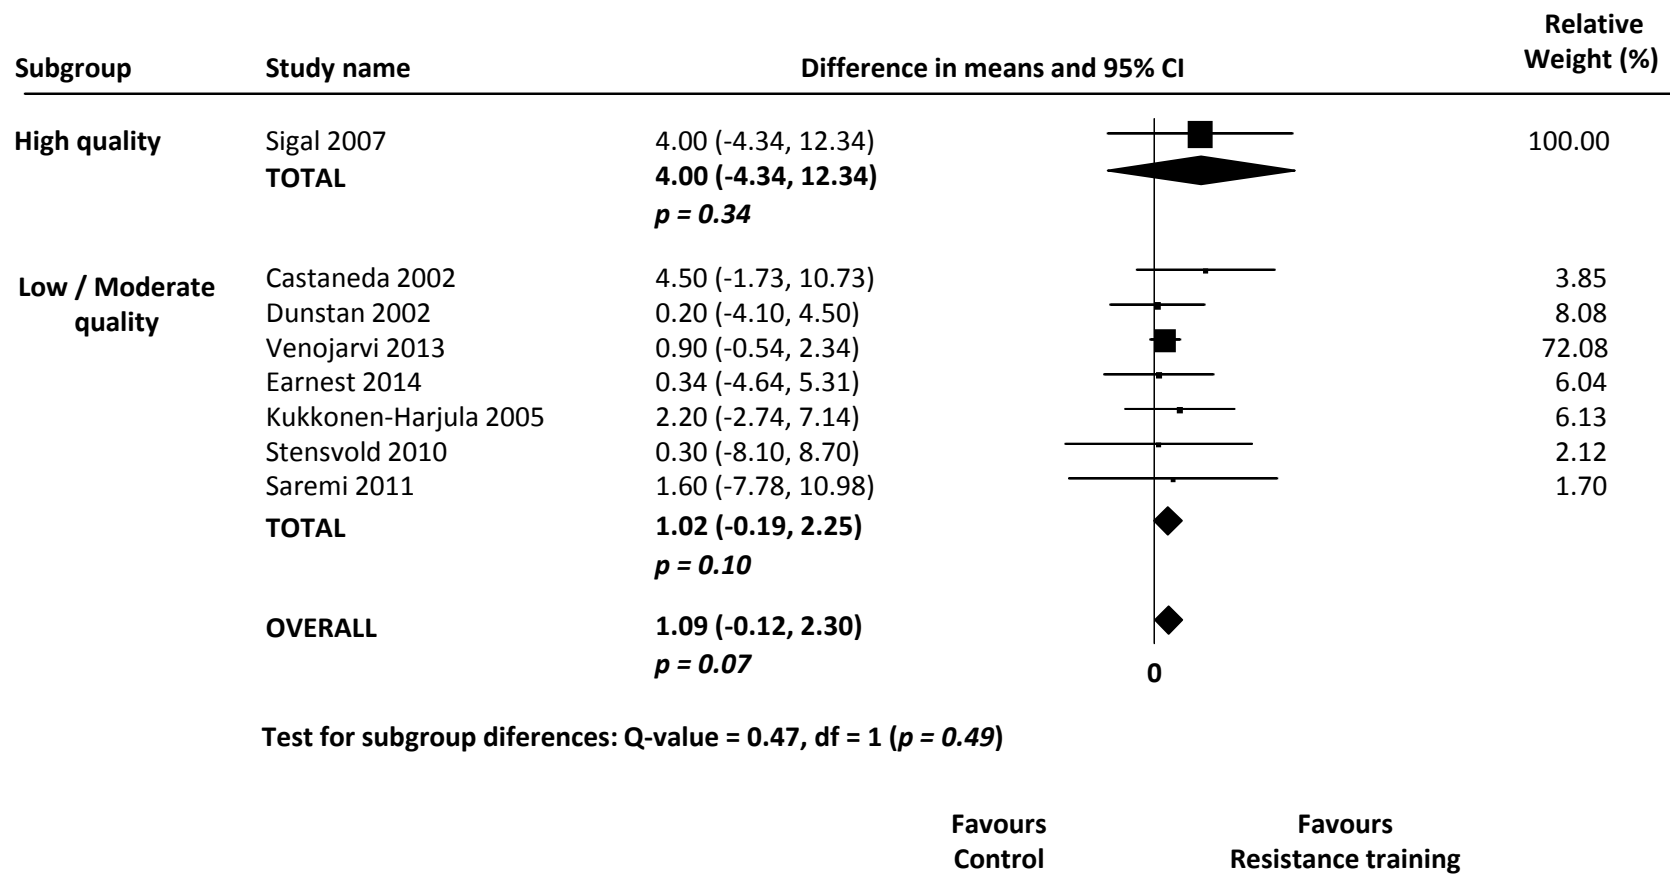

**Figure 12.** Forest plot (high vs low/moderate quality) showing pooled MD with 95% CI for waist circumference.

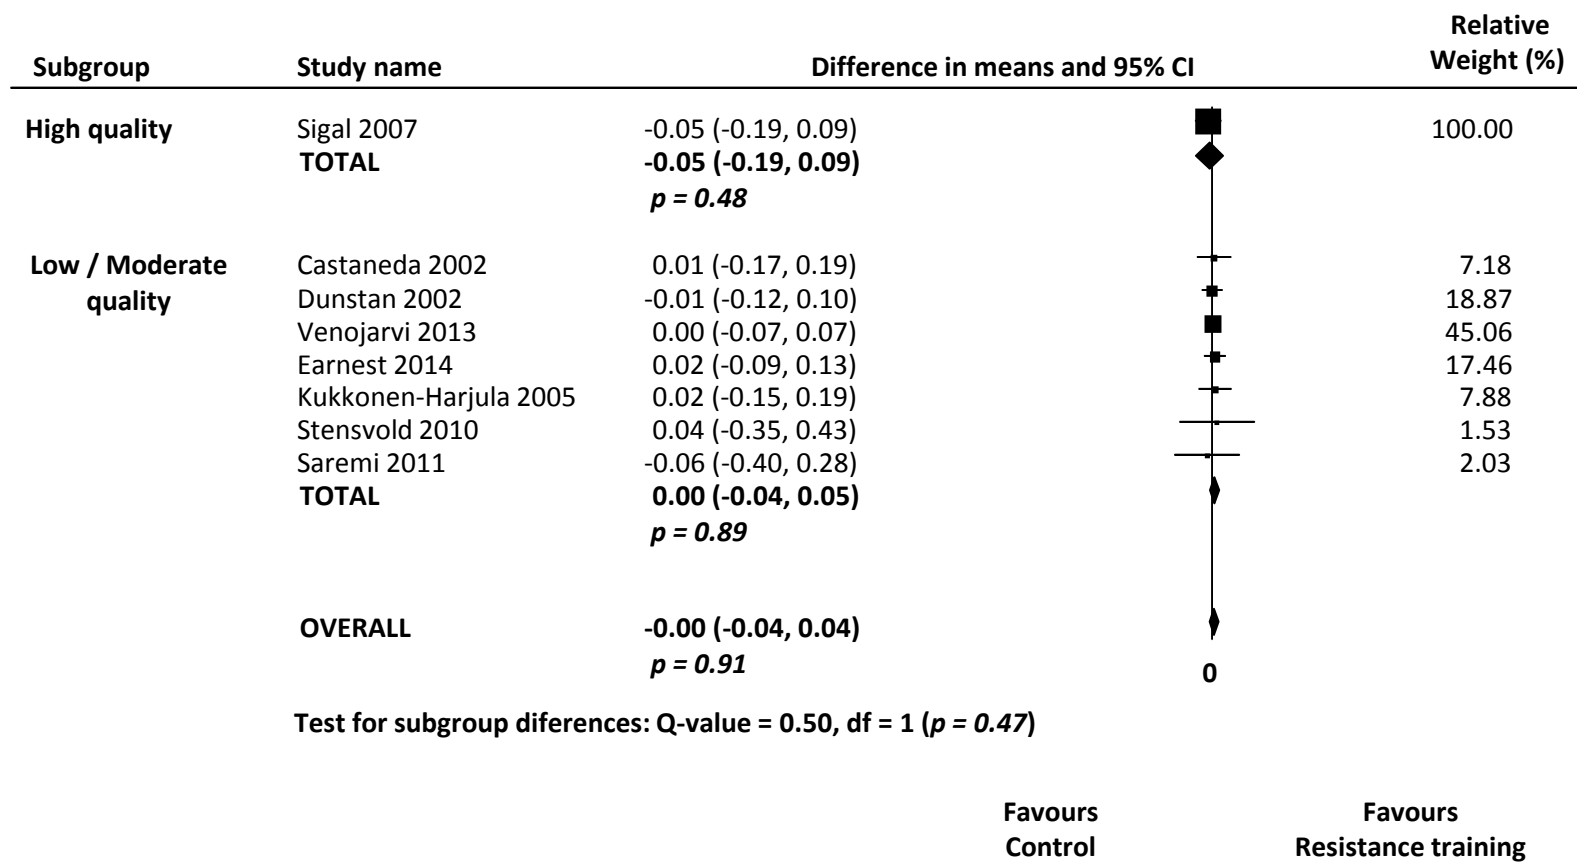

**Figure 13.** Forest plot (high vs low/moderate quality) showing pooled MD with 95% CI for HDL-cholesterol.

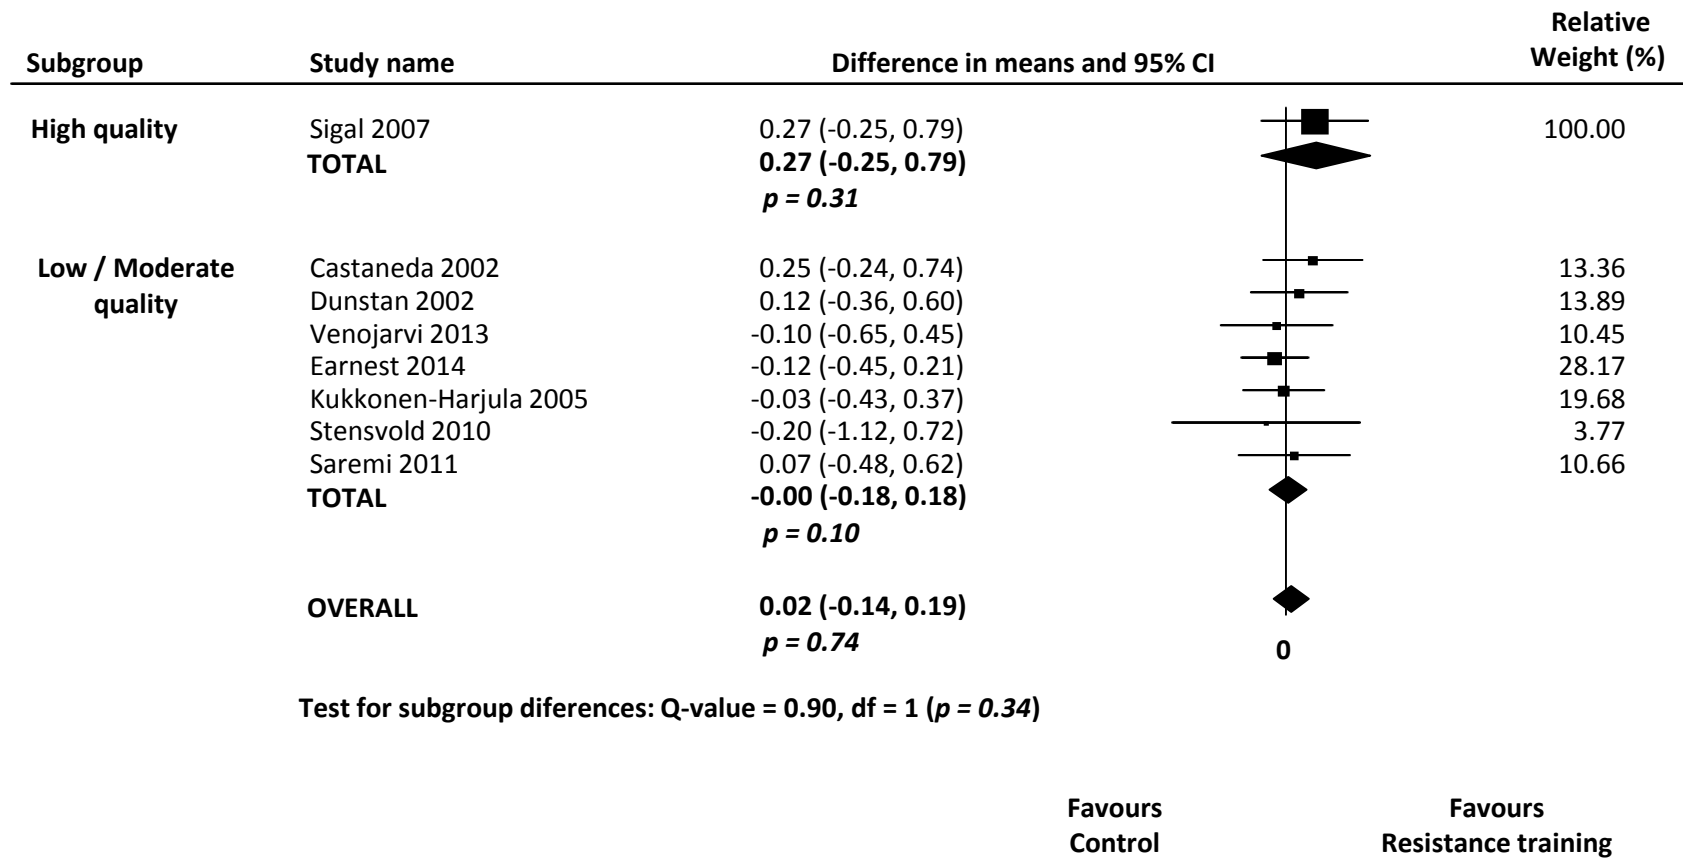

**Figure 14.** Forest plot (high vs low/moderate quality) showing pooled MD with 95% CI for Triglycerides.
