# Supplementary material for: Resistance training reduces systolic blood pressure in metabolic syndrome: a systematic review and meta-analysis of randomised controlled trials
Source: PubMed Central journal article supplement — Br J Sports Med. 2016 Mar 8;50(23):1438–42. doi: 10.1136/bjsports-2015-094715 (PMC5136729; doi:10.1136/bjsports-2015-094715), 2016-03-08
Supplement: bjsports-2015-094715supp_tables.pdf [file bjsports-2015-094715supp_tables.pdf]

**Supplementary Table 1.** Search strategy (up to January 10<sup>th</sup> 2015).

---

**MEDLINE – Result: 253 studies**

1. 'clinical trial'\*\* OR 'controlled trial'\*\* OR 'randomized controlled trial'\* OR 'randomised controlled trial'\*\* OR 'randomized'\*\* OR 'randomised'\*\* OR 'trial'\*\* OR 'controlled clinical trial\*\*'
2. 'metabolic syndrome'\*\* OR 'metabolic syndrome x'\*
3. 1 and 2
4. 'resisted training'\*\* OR 'resistance training'\* OR 'resisted exercise'\*\* OR 'resistance exercise'\*\* OR 'strength training'\*\* OR 'strength exercise\*\*'
5. 3 and 4
6. Animal
7. 5 not 6

---

**EMBASE – Result: 113 studies**

1. 'clinical trial'\*\* OR 'controlled trial'\*\* OR 'randomized controlled trial'\* OR 'randomised controlled trial'\*\* OR 'randomized'\*\* OR 'randomised'\*\* OR 'trial'\*\* OR 'controlled clinical trial\*\*'
2. 'metabolic syndrome'\*\* OR 'metabolic syndrome x'\*
3. 1 and 2
4. 'resisted training'\*\* OR 'resistance training'\* OR 'resisted exercise'\*\* OR 'resistance exercise'\*\* OR 'strength training'\*\* OR 'strength exercise\*\*'
5. 3 and 4
6. Animal
7. 5 not 6

---

**THE COCHRANE LIBRARY – Result: 46 studies**

1. 'clinical trial'\*\* OR 'controlled trial'\*\* OR 'randomized controlled trial'\* OR 'randomised controlled trial'\*\* OR 'randomized'\*\* OR 'randomised\*\*'
-

OR 'trial'\*\* OR 'controlled clinical trial'\*\*

1. 'metabolic syndrome'\*\* OR 'metabolic syndrome x'\*
2. 1 and 2
3. 'resisted training'\*\* OR 'resistance training'\* OR 'resisted exercise'\*\* OR 'resistance exercise'\*\* OR 'strength training'\*\* OR 'strength exercise'\*\*
4. 3 and 4
5. Animal
6. 5 not 6

**Filter: "trials".**

---

**SPORTDiscus – Result: 15 studies**

1. 'clinical trial'\*\* OR 'controlled trial'\*\* OR 'randomized controlled trial'\* OR 'randomised controlled trial'\*\* OR 'randomized'\*\* OR 'randomised'\*\* OR 'trial'\*\* OR 'controlled clinical trial'\*\*
2. 'metabolic syndrome'\*\* OR 'metabolic syndrome x'\*
3. 1 and 2
4. 'resisted training'\*\* OR 'resistance training'\* OR 'resisted exercise'\*\* OR 'resistance exercise'\*\* OR 'strength training'\*\* OR 'strength exercise'\*\*
5. 3 and 4
6. Animal
7. 5 not 6

---

**PEDro – Result: 45 studies**

Abstract & Title: metabolic syndrome

---

Therapy: strength training

Method: clinical trial

---

*\*Medical Subject Headings (MeSH); \*\*Keywords.*

**Supplementary Table 2.** Characteristics of included studies.

| Study name                | Patient characteristics and sample size                                                                                                                                                         | Participants (inclusion/exclusion criteria)                                                                                                                                                                                                                                                                                                          | Study length                 | Interventions                                                                                                                                                                                                                                                            | Metabolic syndrome risk factors assessed and time points                                                     |
|---------------------------|-------------------------------------------------------------------------------------------------------------------------------------------------------------------------------------------------|------------------------------------------------------------------------------------------------------------------------------------------------------------------------------------------------------------------------------------------------------------------------------------------------------------------------------------------------------|------------------------------|--------------------------------------------------------------------------------------------------------------------------------------------------------------------------------------------------------------------------------------------------------------------------|--------------------------------------------------------------------------------------------------------------|
| Castaneda 2002[24]        | n = 62<br>RT group = 31<br>Control group = 31<br><br>% Female = 64.5%<br>RT group = 67.7%<br>Control group = 61%<br><br>Age (Mean ± SD)<br>RT group = 66 ± 2<br>Control group = 66 ± 1          | Inclusion: Confirmation of diabetes diagnosis by fasting plasma glucose ≥ 7.0 mmol/l or use of diabetic medications.<br><br>Exclusion: myocardial infarction (within past 6 months) and any unstable chronic condition, including dementia, alcoholism, dialysis, retinal hemorrhage or detachment, or current participation in resistance training. | 3 days p/ week for 16 wks.   | RT: 5 exercises;<br>intensity: 60-80% 1RM;<br>dose: 9 S/MG/W;<br><br>Training sessions: Supervised.<br><br>Control group: continued usual medical care, received Spanish translated diabetes recommendations for self-management, and were not given dietary counseling. | Triglycerides<br>HDL-C<br>Fasting plasma glucose<br>SBP<br>DBP<br>WC<br><br>Baseline<br>16 wks               |
| Dunstan 2002[26]          | n = 29<br>RT group = 16<br>Control group = 13<br><br>%Female = 44.8%<br>RT group = 37,5%<br>Control group = 53,8%<br><br>Age (Mean ± SD)<br>RT group = 67.6 ± 5.2<br>Control group = 66.9 ± 5.3 | Inclusion: Overweight and sedentary; had established but not optimally controlled type 2 diabetes, were not taking insulin and were nonsmokers.<br><br>Exclusion: history or physical findings suggestive of ischemic heart disease, systemic diseases, uncontrolled hypertension and advanced diabetic neuropathy or retinopathy.                   | 3 days p/ week for 6 months. | RT: 9 exercises;<br>intensity: 50-85% 1RM;<br>dose: 9 S/MG/W;<br><br>Training sessions: Supervised.<br><br>Control group: offered static stretching exercises.                                                                                                           | Triglycerides<br>HDL-C<br>Fasting Plasma Glucose<br>SBP<br>DBP<br>WC<br><br>Baseline<br>3 months<br>6 months |
| Kukkonen-Harjula 2005[27] | N = 68<br>RT group = 26<br>Aerobic group = 20                                                                                                                                                   | Inclusion: Age 35-50 years, BMI range of 30-40 kg/m <sup>2</sup> and waist circumference over 100 cm.                                                                                                                                                                                                                                                | 3 days p/ week for 6 months. | All groups performed a 2-month very-low-energy diet before training programs.                                                                                                                                                                                            | Triglycerides<br>HDL-C<br>Fasting Plasma Glucose                                                             |

|                                                  |                                                                                                                                                                                                                                                   |                                                                                                                                                                                                                                                                                                                                                                                     |                                                                                           |
|--------------------------------------------------|---------------------------------------------------------------------------------------------------------------------------------------------------------------------------------------------------------------------------------------------------|-------------------------------------------------------------------------------------------------------------------------------------------------------------------------------------------------------------------------------------------------------------------------------------------------------------------------------------------------------------------------------------|-------------------------------------------------------------------------------------------|
| Control group = 22                               | Exclusion: Regular medication; plenty of physical activity; smokers; resting blood pressure > 160/105 mmHg; fasting serum cholesterol >8 mmol L <sup>-1</sup> ; triglycerides >4 mmol L <sup>-1</sup> ; blood glucose >6.7 mmol L <sup>-1</sup> . | RT: 6 exercises; intensity: 60-80% 1RM; dose: 9 S/MG/W.                                                                                                                                                                                                                                                                                                                             | SBP<br>DBP<br>WC                                                                          |
| All males                                        |                                                                                                                                                                                                                                                   |                                                                                                                                                                                                                                                                                                                                                                                     |                                                                                           |
| Age (Mean ± SD)<br>All participants = 42.6 ± 4.6 |                                                                                                                                                                                                                                                   | AT: 60-70% VO <sub>2</sub> max; dose: 135 min/week.                                                                                                                                                                                                                                                                                                                                 | Baseline<br>2 months<br>8 months<br>31 months                                             |
|                                                  |                                                                                                                                                                                                                                                   | Training sessions: 1 weekly training session was supervised.                                                                                                                                                                                                                                                                                                                        |                                                                                           |
|                                                  |                                                                                                                                                                                                                                                   | Control group: advised not to increase physical activity.                                                                                                                                                                                                                                                                                                                           |                                                                                           |
| Sigal 2007[28]                                   | n = 251<br>RT group = 64<br>Aerobic group = 60<br>Combined group = 64<br>Control group = 63                                                                                                                                                       | Inclusion: type 2 diabetes for more than 6 months and a baseline hemoglobin A1c value of 6.6% to 9.9%.                                                                                                                                                                                                                                                                              | 3 days p/ week for 6 months.                                                              |
|                                                  | % Female = 36.2%<br>RT group = 37%<br>Aerobic group = 35%<br>Combined group = 37%<br>Control group = 35%                                                                                                                                          | Exclusion: current insulin therapy; participation in exercise 2 or more times weekly or in any resistance training during the previous 6 months; changes during the previous 2 months in oral hypoglycemic, antihypertensive, or lipid-lowering agents or body weight; serum creatinine level of 200 mmol/L or greater; proteinuria greater than 1 g/d; blood pressure greater than | Before randomization, all participants entered a 4-week run-in phase to assess adherence. |
|                                                  |                                                                                                                                                                                                                                                   | RT: 7 exercises; intensity: 7-9 RM; dose: 6-9 S/MG/W.                                                                                                                                                                                                                                                                                                                               | Triglycerides<br>HDL-C<br>SBP<br>DBP<br>WC<br><br>Baseline<br>3 months<br>6 months        |
|                                                  |                                                                                                                                                                                                                                                   | AT: 60-75% VO <sub>2</sub> max; dose: 45-135 min/week.                                                                                                                                                                                                                                                                                                                              |                                                                                           |
|                                                  | Age (Mean ± SD)<br>RT group = 54.7 ± 7.5<br>Aerobic group = 53.9 ± 6.6                                                                                                                                                                            | Combined group: RT + AT.                                                                                                                                                                                                                                                                                                                                                            |                                                                                           |
|                                                  |                                                                                                                                                                                                                                                   | Training sessions: Individual exercise supervision was                                                                                                                                                                                                                                                                                                                              |                                                                                           |

|                   |                                                                                                                                                                                                                                                                                                         |                                                                                                                                                                                                                                                                              |                                              |                                                                                                                                                                                                                                                                                                                                                  |                                                                                                                               |
|-------------------|---------------------------------------------------------------------------------------------------------------------------------------------------------------------------------------------------------------------------------------------------------------------------------------------------------|------------------------------------------------------------------------------------------------------------------------------------------------------------------------------------------------------------------------------------------------------------------------------|----------------------------------------------|--------------------------------------------------------------------------------------------------------------------------------------------------------------------------------------------------------------------------------------------------------------------------------------------------------------------------------------------------|-------------------------------------------------------------------------------------------------------------------------------|
|                   | <p>Combined group = 53.5 ± 7.3</p> <p>Control group = 54.8 ± 7.2</p>                                                                                                                                                                                                                                    | <p>160/95 mmHg; restrictions in physical activity because of disease; presence of other medical conditions that made participation inadvisable.</p>                                                                                                                          |                                              | <p>provided weekly for the first 4 weeks after randomization and biweekly thereafter.</p> <p>Control group: asked to revert to pre-study activity levels.</p>                                                                                                                                                                                    |                                                                                                                               |
| Stensvold 2010[8] | <p>n = 43</p> <p>RT group = 11</p> <p>Aerobic group = 11</p> <p>Combined group = 10</p> <p>Control group = 11</p> <p>% Female = 39.5%</p> <p>Age (Mean ± SD)</p> <p>RT group = 50.9 ± 7.6</p> <p>Aerobic group = 49.9 ± 10.1</p> <p>Combined group = 52.9 ± 10.4</p> <p>Control group = 47.3 ± 10.2</p> | <p>Inclusion: Patients with metabolic syndrome according to International Diabetes Federation.</p> <p>Exclusion: unstable angina pectoris, uncompensated heart failure, myocardial infarction during the past 4 wk, complex ventricular arrhythmias, and kidney failure.</p> | <p>Sessions 3 days p/ week for 12 weeks.</p> | <p>RT: 7 exercises; intensity: 60-80% 1RM; dose: 9 S/MG/W.</p> <p>AT: 70-95% HR<sub>peak</sub>; dose: 129 min/week.</p> <p>Combined group: RT (1x p/wk) + AT (2x p/wk).</p> <p>Training sessions: Supervised.</p> <p>Control group: was instructed not to change their dietary patterns or physical activity levels during the study period.</p> | <p>Triglycerides</p> <p>HDL-C</p> <p>Fasting Plasma Glucose</p> <p>SBP</p> <p>DBP</p> <p>WC</p> <p>Baseline</p> <p>12 wks</p> |
| Saremi 2011[10]   | <p>n= 21</p> <p>RT group = 11</p> <p>Control group = 10</p> <p>All male</p> <p>Age (Mean ± SD)</p> <p>All participants = 45,25 ±</p>                                                                                                                                                                    | <p>Inclusion: Males with the metabolic syndrome (based International Diabetes Federation); Low physical activity level (less than 30 minutes of physical activity per day); Aged between 20-60.</p>                                                                          | <p>Sessions 3 days p/ week for 12 weeks.</p> | <p>RT: intensity: 30-85% 1RM; dose: 6-9 SMG/W.</p> <p>Training sessions: Supervised.</p> <p>Control group: not participate in any regular exercise.</p>                                                                                                                                                                                          | <p>Triglycerides</p> <p>HDL-C</p> <p>Fasting Plasma Glucose</p> <p>WC</p> <p>Baseline</p> <p>12 wks</p>                       |

|                    |                                                                                                                                                                                                                                                                                                                                       |                                                                                                                                                                                                                                                                                                                                                       |                                       |                                                                                                                                                                                |                                                                                                  |
|--------------------|---------------------------------------------------------------------------------------------------------------------------------------------------------------------------------------------------------------------------------------------------------------------------------------------------------------------------------------|-------------------------------------------------------------------------------------------------------------------------------------------------------------------------------------------------------------------------------------------------------------------------------------------------------------------------------------------------------|---------------------------------------|--------------------------------------------------------------------------------------------------------------------------------------------------------------------------------|--------------------------------------------------------------------------------------------------|
|                    | 4,3                                                                                                                                                                                                                                                                                                                                   | Exclusion: Cardiovascular disease; Musculoskeletal problems; Receiving any other treatments.                                                                                                                                                                                                                                                          |                                       |                                                                                                                                                                                |                                                                                                  |
| Venojarvi 2013[11] | n = 144<br>RT group = 49<br>Aerobic group = 48<br>Control group = 47<br><br>All males<br><br>Age (Mean ± SD)<br>RT group = 54 ± 6.1<br>Aerobic group = 55 ± 6.2<br>Control group = 54 ± 7.2                                                                                                                                           | Inclusion: age 40-65 years; BMI between 25.1 and 34.9 kg/m <sup>2</sup> ; and fasting plasma glucose between 5.6 and 6.9 mmol/L.<br><br>Exclusion: earlier detection of IGT and engagement in prescribed diet or exercise programs, engagements in regular and physically very rigorous activities and usage of medication affecting glucose balance. | Sessions 3x p/ week for 12 weeks.     | RT: 50-85% 5RM;<br>dose: 125 min/wk.<br><br>AT: 55-75% of Heart Rate reserve;<br>dose: 103 min/wk.                                                                             | Triglycerides<br>HDL-C<br>Fasting Plasma Glucose<br>SBP<br>DBP<br>WC<br><br>Baseline<br>12 wks   |
| Earnest 2014[7]    | n = 262<br>RT group = 73<br>Aerobic group = 72<br>Combined group = 76<br>Control group = 41<br><br>%Female = 62.2%<br>RT group = 59%<br>Aerobic group = 62%<br>Combined group = 64%<br>Control group = 68%<br><br>Age (Mean ± SD)<br>RT group = 57 ± 9<br>Aerobic group = 54 ± 9<br>Combined group = 55 ± 8<br>Control group = 59 ± 8 | Inclusion: type 2 diabetes; sedentary (not participating in RT and Aerobic exercise).<br><br>Exclusion: history of stroke, advanced neuropathy or retinopathy, or other serious medical condition contraindicated for exercise or that may prevent adherence to the study protocol.                                                                   | Sessions 3 days p/ week for 9 months. | RT: 7 exercises;<br>intensity: 10-12 RM;<br>dose: 6-9 S/MG/W.<br><br>AT: 65% VO <sub>2peak</sub> ;<br>dose: 150 min/wk.                                                        | Triglycerides<br>HDL-C<br>Fasting Plasma Glucose<br>SBP<br>DBP<br>WC<br><br>Baseline<br>9 months |
|                    |                                                                                                                                                                                                                                                                                                                                       |                                                                                                                                                                                                                                                                                                                                                       |                                       | Combined group: 2x p/wk of RT and 3-5x p/wk of aerobic training.<br><br>Training sessions: Supervised.<br><br>Control group: Offered weekly stretching and relaxation classes. |                                                                                                  |

---

**RT:** Resistance Training; **AT:** Aerobic Training; **RM:** Repetition Maximum; **CHD:** Coronary Heart Disease; **BMI:** Body Mass Index; **HDL-C:** High Density Lipoprotein Cholesterol; **SBP:** Systolic Blood Pressure; **DBP:** Diastolic Blood Pressure; **WC:** Waist Circumference; **IGT:** Impaired Glucose Tolerance; **S/MG/W:** Sets for each muscle group per week; **HR:** Heart rate.

---



**Supplementary Table 3.** Risk of bias of included studies (PEDro).

| Study                 | Eligibility criteria specified | Random allocation | Concealed allocation | Groups similar at baseline | Participant blinding | Therapist blinding | Assessor blinding | Adequate follow-up | Intention to treat analysis | Between group comparisons | Point estimates and variability | Total (0-10) |
|-----------------------|--------------------------------|-------------------|----------------------|----------------------------|----------------------|--------------------|-------------------|--------------------|-----------------------------|---------------------------|---------------------------------|--------------|
| Castaneda 2002        | No                             | Yes               | No                   | No                         | No                   | No                 | Yes               | Yes                | Yes                         | Yes                       | Yes                             | 6            |
| Dunstan 2002          | Yes                            | Yes               | No                   | Yes                        | No                   | No                 | No                | No                 | No                          | Yes                       | Yes                             | 4            |
| Kukkonen-Harjula 2005 | Yes                            | Yes               | No                   | Yes                        | No                   | No                 | No                | Yes                | No                          | Yes                       | Yes                             | 5            |
| Sigal 2007            | Yes                            | Yes               | Yes                  | Yes                        | No                   | No                 | Yes               | Yes                | Yes                         | Yes                       | Yes                             | 8            |
| Stensvold 2010        | Yes                            | Yes               | Yes                  | Yes                        | No                   | No                 | No                | Yes                | No                          | Yes                       | Yes                             | 6            |
| Saremi 2011           | Yes                            | Yes               | No                   | Yes                        | No                   | No                 | No                | No                 | No                          | Yes                       | Yes                             | 4            |
| Venojarvi 2013        | Yes                            | Yes               | No                   | Yes                        | No                   | No                 | No                | No                 | No                          | Yes                       | Yes                             | 4            |
| Earnest 2014          | No                             | Yes               | No                   | Yes                        | No                   | No                 | No                | No                 | No                          | Yes                       | Yes                             | 4            |

**Supplementary Table 4.** Quality summary of outcome assessment (GRADE).

| Outcomes                                         | Quality Assessment         |                          |                             | Patient, n |               | Effect              | Quality  |
|--------------------------------------------------|----------------------------|--------------------------|-----------------------------|------------|---------------|---------------------|----------|
|                                                  | Risk of Bias<br>‡          | Inconsistency<br>§       | Imprecision<br>¶            | RT Group   | Control Group | MD† (95% CI)        |          |
| <b>Fasting Plasma Glucose</b><br>Seven studies   | Serious limitation<br>(-1) | No serious inconsistency | Serious imprecision<br>(-1) | 202        | 168           | 0.04 (-0.12, 0.20)  | Low      |
| <b>HDL-Cholesterol</b><br>Eight studies          | Serious limitation<br>(-1) | No serious inconsistency | No serious imprecision      | 266        | 231           | -0.00 (-0.05, 0.04) | Moderate |
| <b>Triglycerides</b><br>Eight studies            | Serious limitation<br>(-1) | No serious inconsistency | No serious imprecision      | 266        | 231           | 0.03 (-0.14, 0.20)  | Moderate |
| <b>Diastolic Blood Pressure</b><br>Seven studies | Serious limitation<br>(-1) | No serious inconsistency | No serious imprecision      | 255        | 221           | 1.39 (-0.19, 2.98)  | Moderate |
| <b>Systolic Blood Pressure</b><br>Seven studies  | Serious limitation<br>(-1) | No serious inconsistency | No serious imprecision      | 255        | 221           | 4.08 (1.33, 6.82)   | Moderate |
| <b>Waist Circumference</b><br>Eight studies      | Serious limitation<br>(-1) | No serious inconsistency | No serious imprecision      | 266        | 231           | 1.09 (-0.12, 2.30)  | Moderate |

† Mean Difference (MD) of the resistance training group compared with the control group.

‡ More than 25% of participants from studies with low methodological quality (Physiotherapy Evidence Database (PEDro) score <7 points).

§ Substantial  $I^2$  (>75%).

¶ Fewer than 400 participants for each outcome.
